# Supplementary material for: Unlocking efficient overall water splitting reactions using sulphur-doped carbon dot electrocatalysts
Source: Royal Society of Chemistry journal article supplement (doi:10.1039/d5se00315f), 2025-01-01
Supplement: d5se00315f1.pdf [file d5se00315f1.pdf]

## **SUPPORTING INFORMATION**

### **Unlocking Efficient Overall Water Splitting Reactions on Sulphur-Doped Carbon dot Electrocatalysts**

**Rohini A. Kale,<sup>a</sup> Pratiksha D. Tanwade,<sup>a</sup> Balaji B. Mulik,<sup>a, b</sup> Bhaskar R. Sathe<sup>\*a,c</sup>**

*<sup>a</sup>Department of Chemistry, Dr. Babasaheb Ambedkar Marathwada University,  
Chhatrapati Sambhajinagar (MH) India-431004.*

*<sup>b</sup>MGM University, Chhatrapati Sambhajinagar- 431004*

*<sup>c</sup>Department of Nanoscience and Technology, Dr. Babasaheb Ambedkar Marathwada  
University, Chhatrapati Sambhajinagar (MH) India-431004.*

*Email: [bsathe.chemistry@bamu.ac.in](mailto:bsathe.chemistry@bamu.ac.in) ; [bhaskarsathe@gmail.com](mailto:bhaskarsathe@gmail.com)*

#### **List of Content**

**S1: BET surface area measurement studies**

**S2: FTIR and TGA**

**S3: XPS of CDs**

**S4: Concentration, pH dependent studies and i-t measurements for HER**

**S5: ECSA studies for HER**

**S6: Repeatability for HER**

**S7: Concentration, pH dependent studies and i-t measurements for OER**

**S8: ECSA studies for OER**

**S9: Repeatability for OER**

### S1: BET surface area measurement studies:

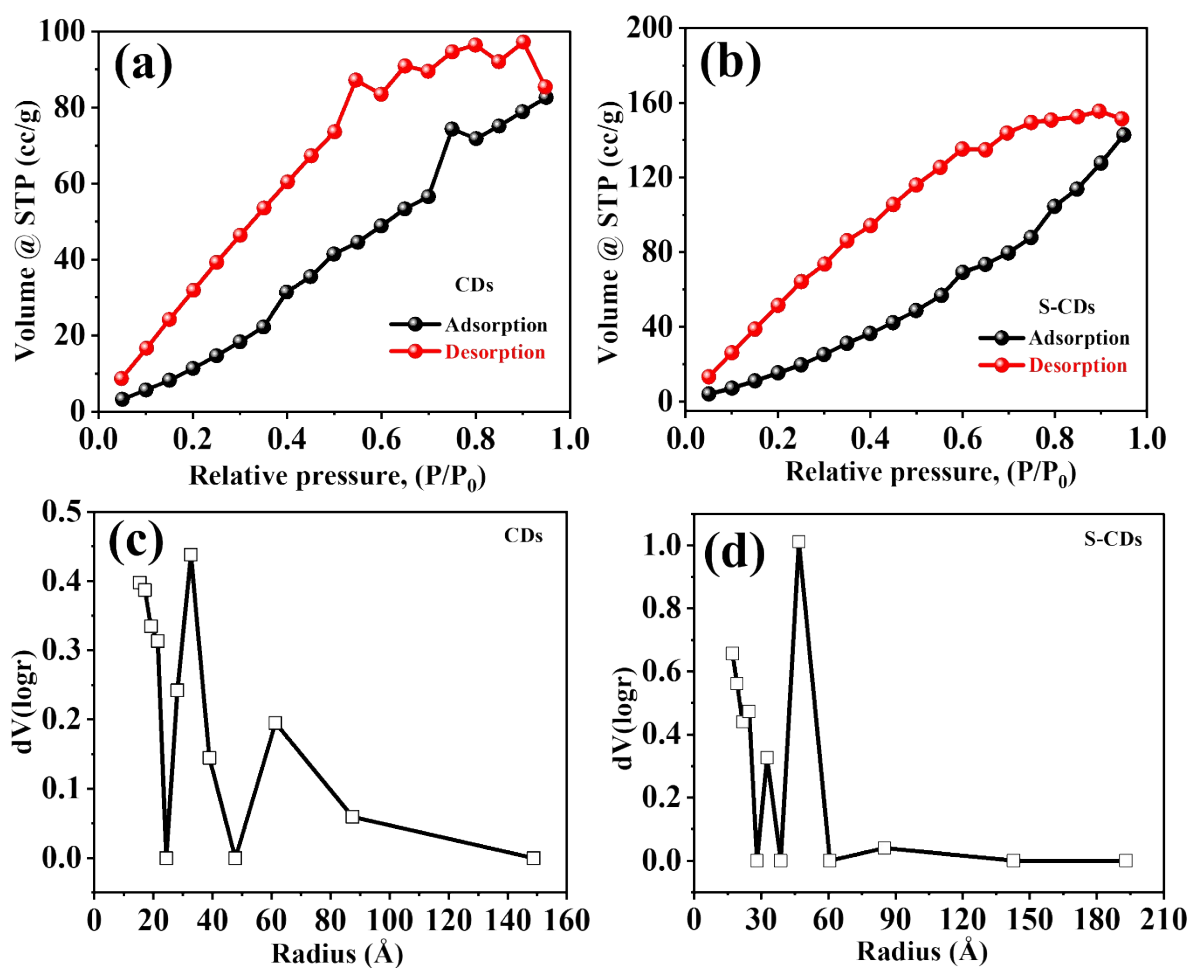

**Fig S1:** Brunauer–Emmett–Teller (BET) surface area analysis having (a) N<sub>2</sub> adsorption-desorption isotherms of (a) CDs (b) S-CDs and BJH pore size distribution of (c) CDs (d) S-CDs.

### S2: FTIR and TGA Analysis:

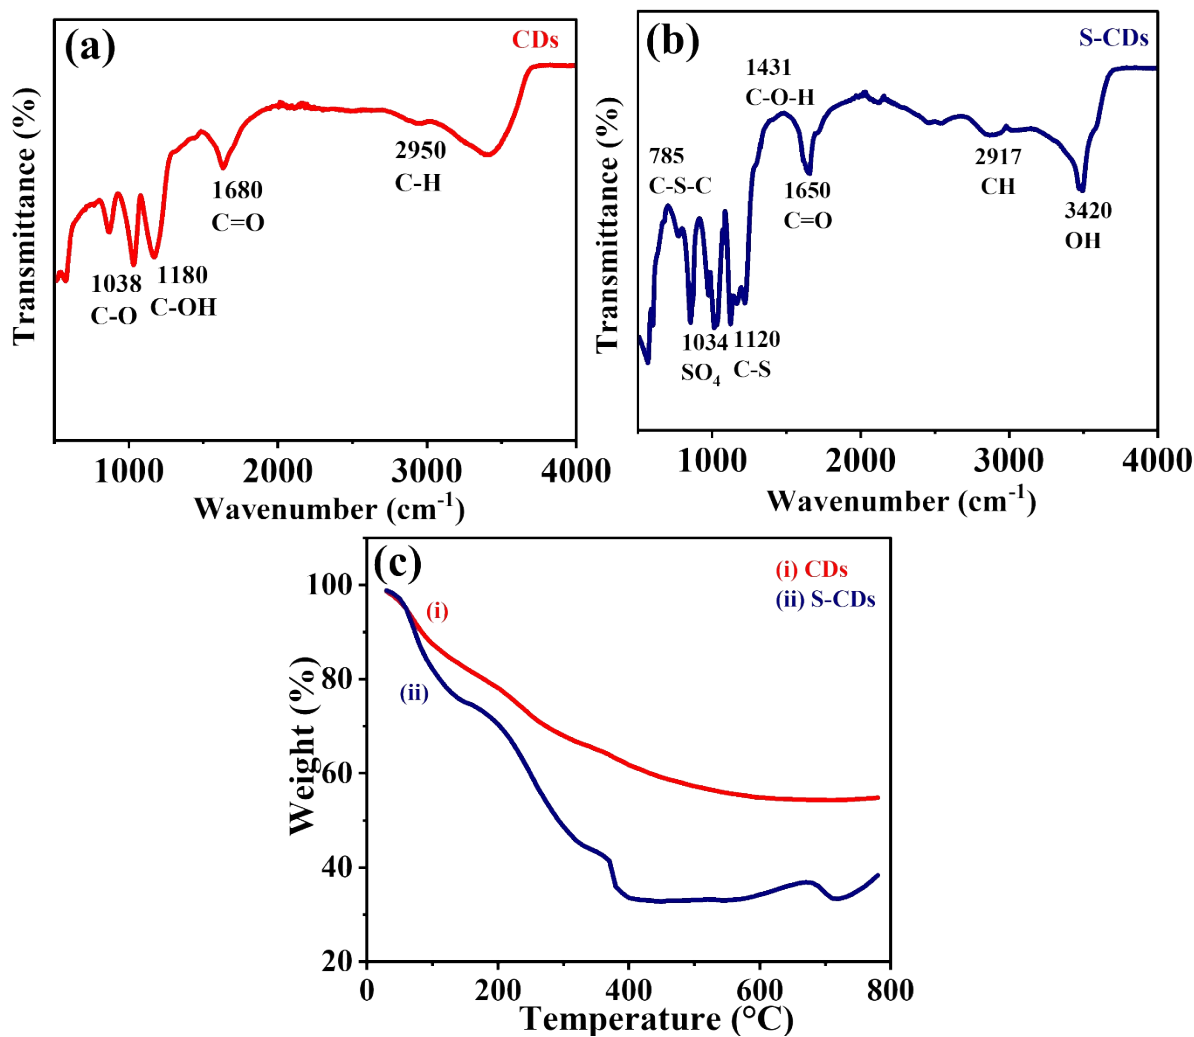

**Fig S2:** (a) FTIR CDs (b) FTIR S-CDs and (c) TGA of as synthesized S-CDs compared with CDs.

### S3: X-ray Photoelectron Spectroscopy of CDs:

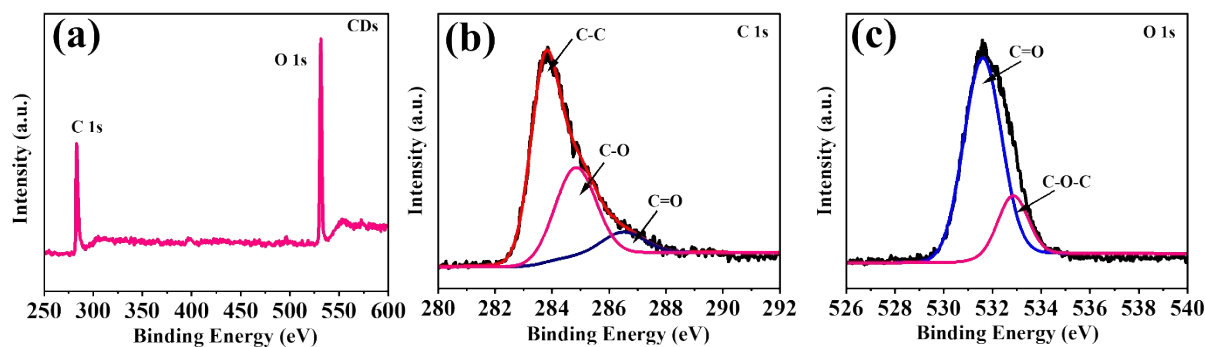

**Fig S3:** (a) Full survey X-ray photoelectron spectra (XPS) of CDs confirms C and O elements, and individual spectra of (b) C1s, represents C-C, C-O, C=O bonding, (c) O1s, indicated C=O, C-O-C.

#### S4: Concentration, pH dependent studies and i-t measurements for HER:

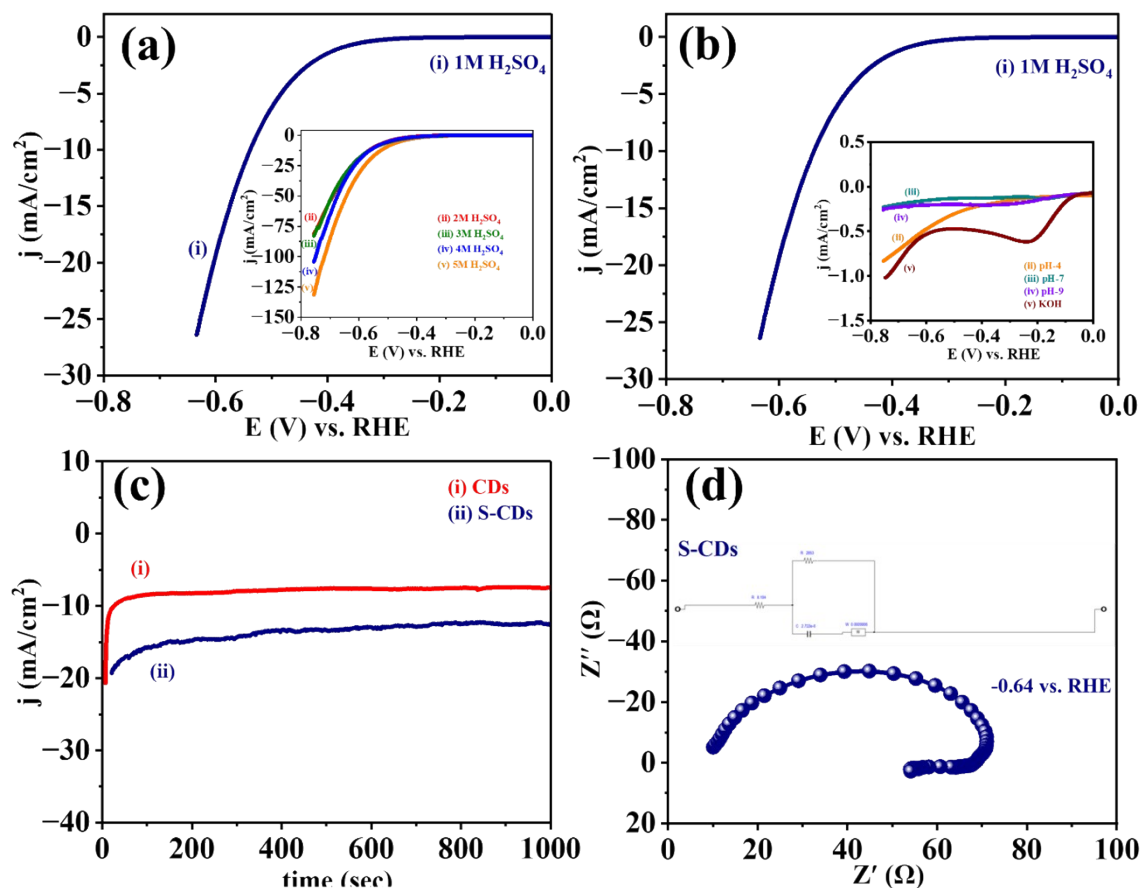

**Fig S4:** (a) Concentration dependent LSV of S-CDs from 1 M to 5 M H<sub>2</sub>SO<sub>4</sub> solutions. (b) pH dependent LSV (c) chronoamperometric (i-t) stability of (i) CDs (ii) S-CDS in 1 M H<sub>2</sub>SO<sub>4</sub> for 1000 sec. (d) EIS (zoom) S-CDs.

#### S5: Electrochemical active surface area (ECSA) and roughness factor for HER:

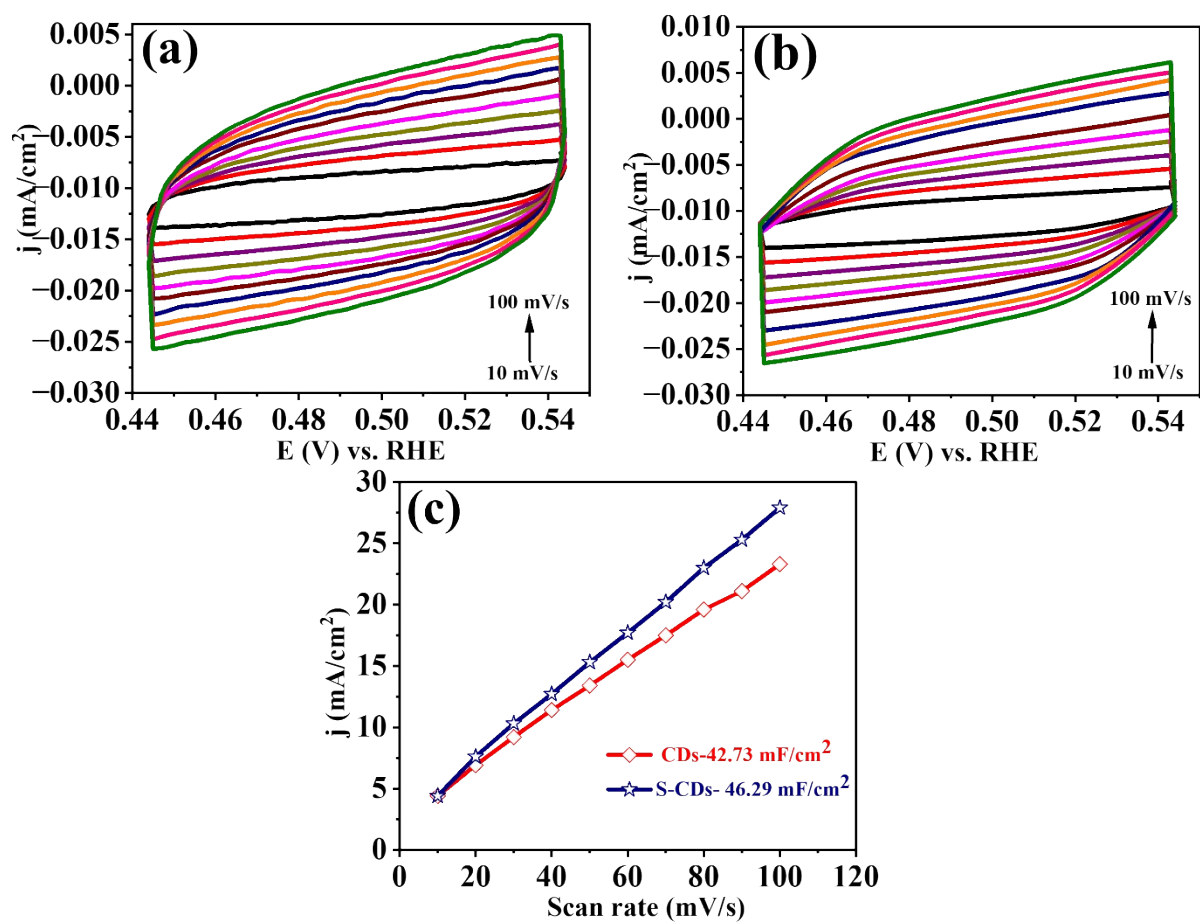

**Fig S5:** Effective electrochemical active surface area tests (ECSA) of (a) CDs (b) S-CDs (c) electrochemical double-layer capacity ( $C_{dl}$ ) of CDs and S-CDs for HER.

#### S6: Repeatability Profile for HER Studies:

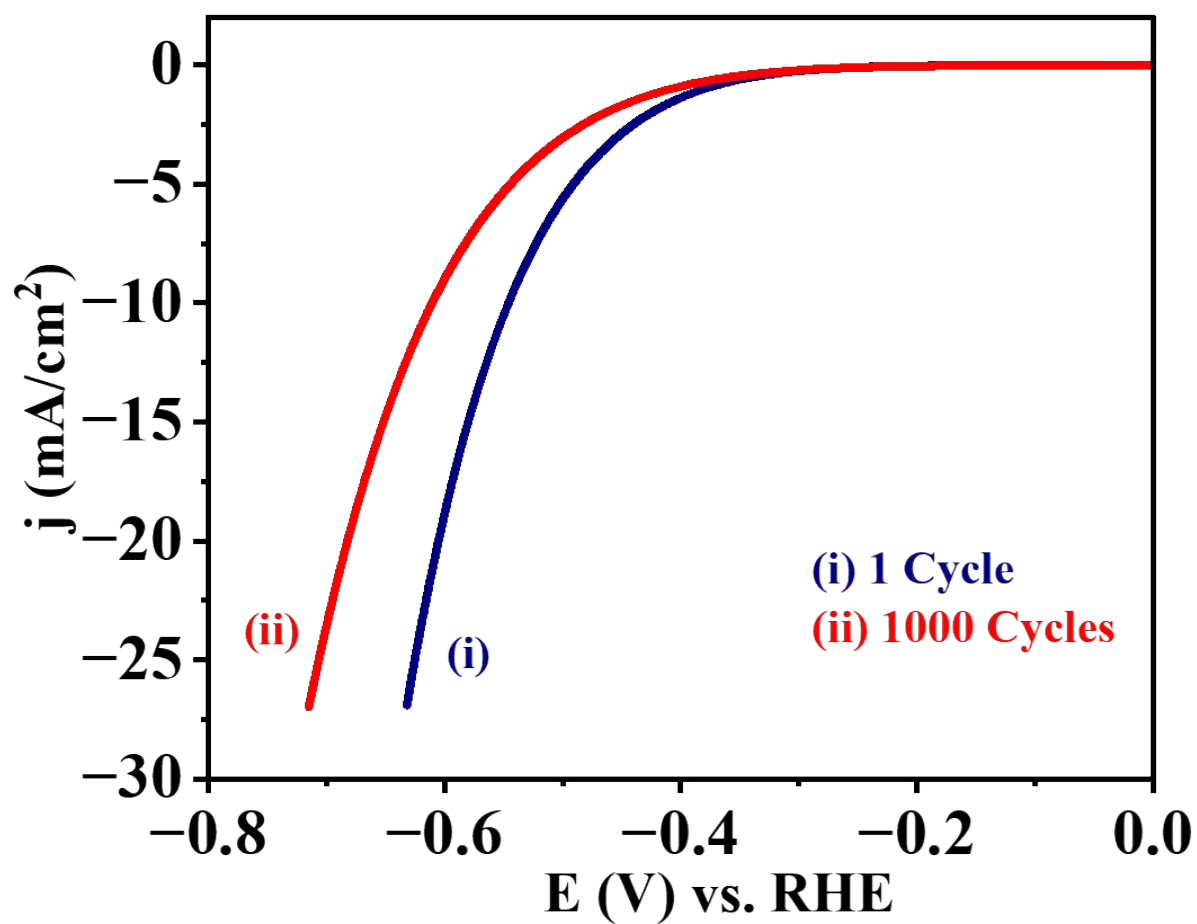

**Fig S6:** Superimposed linear sweep voltammetry (LSV) curves of S-CDs at 1st and 1000th cycles in 1 M H<sub>2</sub>SO<sub>4</sub> solution at a scan rate of 50 mV/s.

**Fig S7:** Concentration, pH dependent studies and i-t measurements for OER Studies:

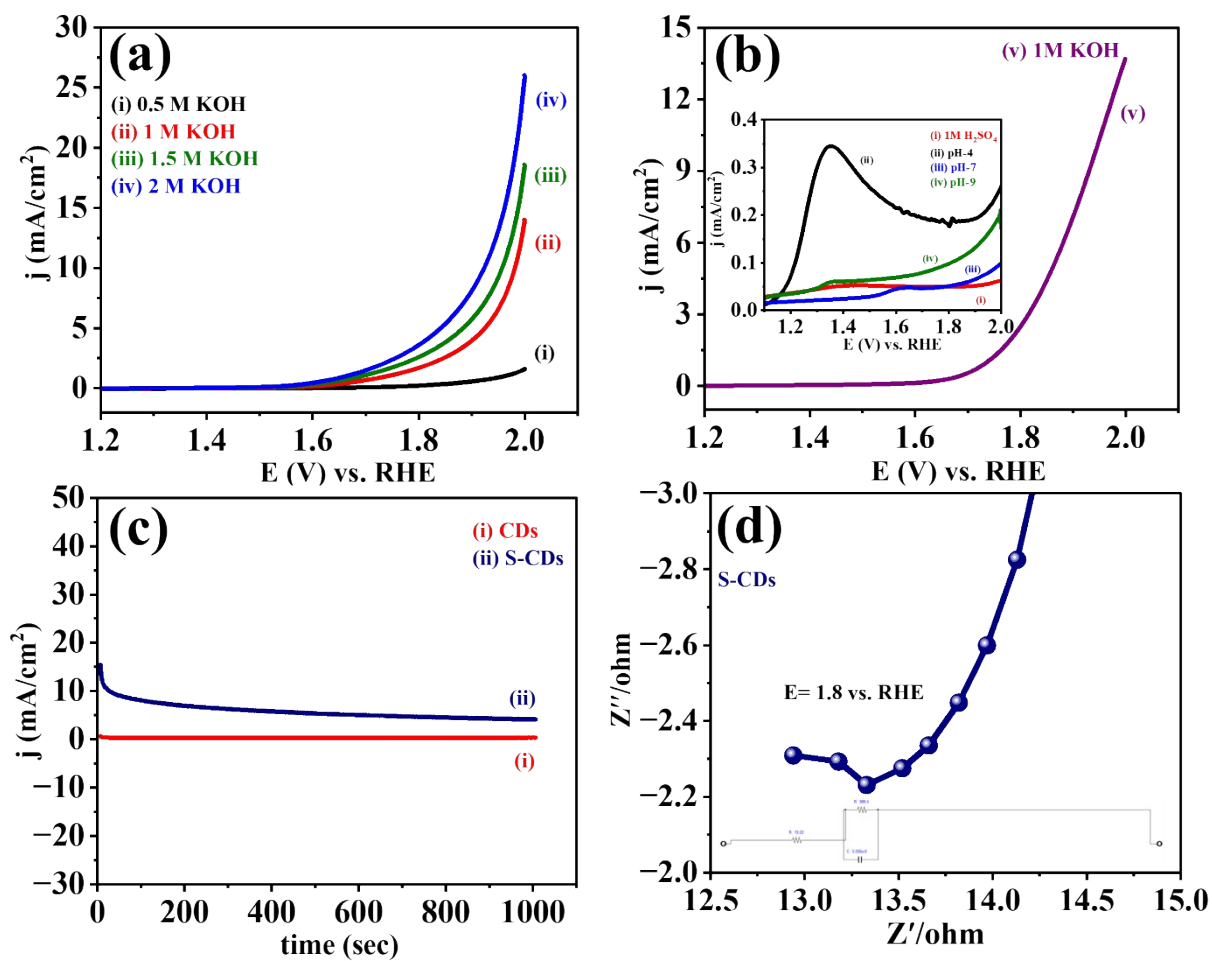

**Fig S7:** Concentration dependent LSV of S-CDs from 0.5M to 2M KOH solutions. (b) pH dependent LSV (c) chronoamperometric (i-t) stability of (i) CDs (ii) S-CDs in 1M KOH for 1000 sec. (d) EIS (zoom) S-CDs.

**Fig S8:** Electrochemical active surface area (ECSA) and roughness factor for OER Studies:

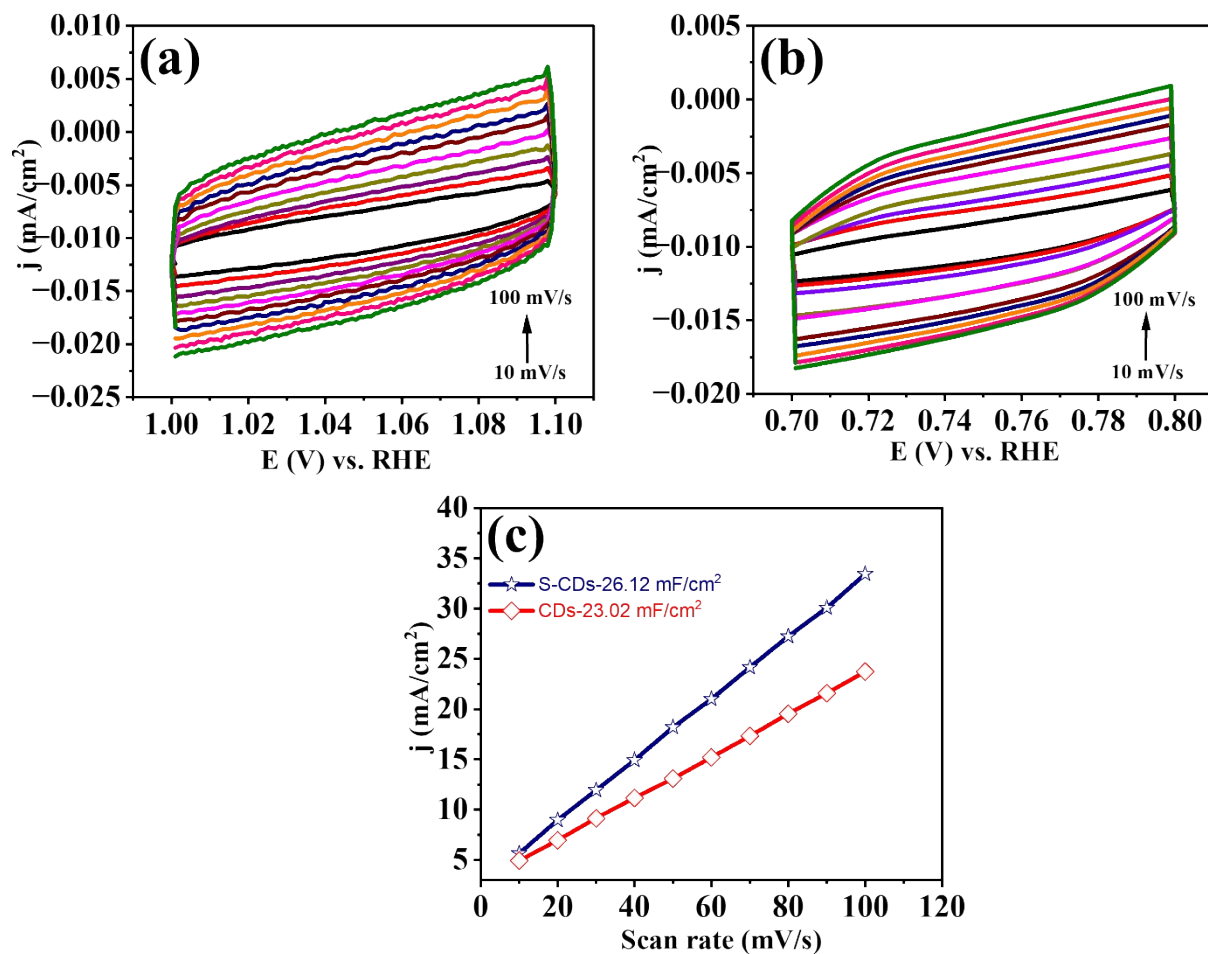

**Fig S8:** Effective electrochemical active surface area tests (ECSA) of (a) CDs (b) S-CDs (c) electrochemical double-layer capacity ( $C_{dl}$ ) of CDs and S-CDs for OER.

**Fig S9:** Repeatability for OER Studies:



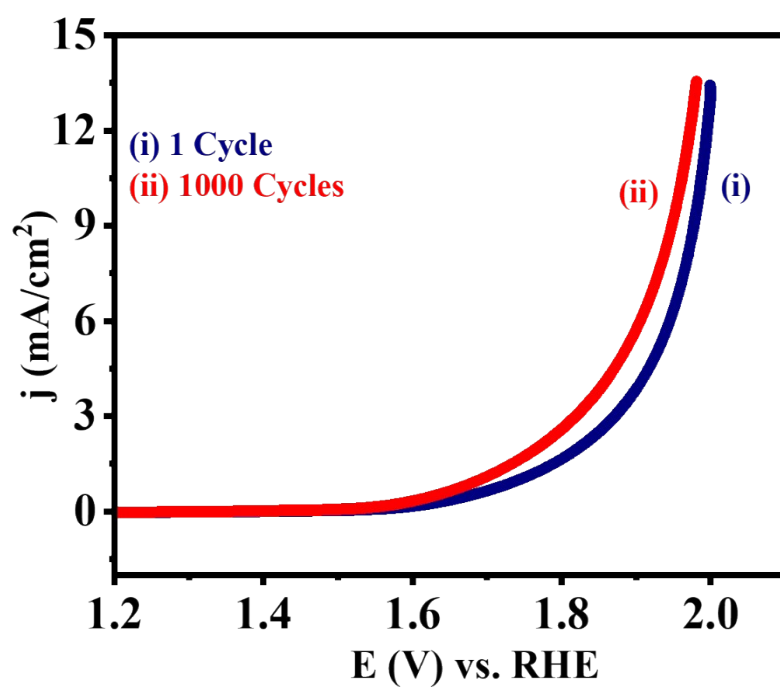

**Fig S9:** Superimposed linear sweep voltammetry (LSV) curves of S-CDs at 1st and 1000th cycles in 1 M KOH solution at a scan rate of 50 mV/s.
